# Supplementary material for: Pan-cancer analysis of the prognostic and immunological role of PSMB8
Source: Sci Rep. 2021 Oct 14;11:20492. doi: 10.1038/s41598-021-99724-9 (PMC8516870; doi:10.1038/s41598-021-99724-9)
Supplement: Supplementary file 2 — Supplementary Information 2. [file 41598_2021_99724_MOESM2_ESM.xlsx]

## Sheet: Sheet1
OS	p.value	HR	95%CI_lower	95%CI_upper	SampleSize		DSS	p.value	HR	95%CI_lower	95%CI_upper	SampleSize			PFI	p.value	HR	95%CI_lower	95%CI_upper	SampleSize		DFI	p.value	HR	95%CI_lower	95%CI_upper	SampleSize
LGG	1.63388e-08	1.83885	1.48842	2.27178	506		LGG	2.32939e-07	1.78935	1.43521	2.23087	498			LGG	1.15318e-05	1.45162	1.22894	1.71466	506		PAAD	0.0141312	2.12753	1.16412	3.88824	69
SKCM	8.38443e-07	0.750406	0.669393	0.841224	452		SKCM	1.60414e-06	0.743546	0.658772	0.839228	446			PAAD	0.00163199	1.59185	1.19202	2.12581	176		BRCA	0.0931832	0.834473	0.675562	1.03076	936
LAML	0.000224405	2.30526	1.47928	3.59245	130		UVM	0.00444076	1.54121	1.14404	2.07625	80			SKCM	0.00311228	0.859344	0.777182	0.950191	448		BLCA	0.14018	0.820435	0.630719	1.06722	186
PAAD	0.000234773	1.90007	1.34967	2.6749	176		PAAD	0.00679055	1.658	1.14973	2.39097	170			BRCA	0.0078684	0.810454	0.694093	0.946322	1076		SARC	0.140993	1.22304	0.935453	1.59903	152
BRCA	0.000907546	0.769443	0.659075	0.898294	1076		BRCA	0.0187559	0.777316	0.630037	0.959022	1057			UVM	0.0126229	1.39343	1.07365	1.80846	79		CESC	0.143966	1.39321	0.892973	2.17369	174
UVM	0.0013204	1.61006	1.20395	2.15316	80		MESO	0.0380473	0.682961	0.476347	0.979193	64			BLCA	0.0777568	0.899396	0.799433	1.01186	407		KIRP	0.159056	1.52286	0.848085	2.73453	182
MESO	0.00641114	0.663073	0.493475	0.890959	84		KICH	0.0437622	4.06444	1.04	15.8843	64			KICH	0.119089	2.32841	0.804412	6.73968	64		OV	0.180809	0.897935	0.766955	1.05128	179
THCA	0.0188156	0.544652	0.328062	0.904235	501		BLCA	0.0778496	0.880291	0.763971	1.01432	392			GBM	0.244007	1.14515	0.911666	1.43844	160		STAD	0.192426	0.782037	0.540348	1.13183	213
SARC	0.0235518	0.780132	0.629263	0.967173	259		LUAD	0.0898765	1.2128	0.970425	1.5157	465			LUAD	0.276885	1.09483	0.929876	1.28904	500		MESO	0.31741	1.86511	0.54957	6.32978	13
READ	0.0316154	0.55049	0.319396	0.948787	159		OV	0.101845	0.906097	0.805134	1.01972	349			HNSC	0.290364	1.08996	0.929097	1.27869	499		READ	0.33302	0.581721	0.194242	1.74215	47
BLCA	0.0422495	0.885208	0.786944	0.995741	406		LUSC	0.154629	1.18985	0.936569	1.51164	442			THCA	0.299675	1.23395	0.829398	1.83584	501		LUAD	0.466063	1.09684	0.855464	1.40632	299
LUAD	0.0444522	1.19249	1.00437	1.41583	500		THCA	0.157314	0.574803	0.266823	1.23827	495			MESO	0.326207	0.851556	0.617867	1.17363	82		THCA	0.534041	1.18686	0.691679	2.03655	352
OV	0.0683207	0.902023	0.80736	1.00778	374		TGCT	0.162466	2.79846	0.660422	11.8581	134			STAD	0.358045	0.90948	0.742882	1.11344	355		HNSC	0.539362	1.13312	0.760254	1.68886	124
KICH	0.113665	2.60422	0.795549	8.52488	64		SARC	0.176037	0.846633	0.665209	1.07754	253			OV	0.359313	0.951493	0.855527	1.05822	374		LGG	0.546169	1.15332	0.725714	1.83287	131
KIRC	0.139614	0.823242	0.63599	1.06562	528		HNSC	0.325413	1.10608	0.904727	1.35224	474			READ	0.385967	0.810737	0.504523	1.3028	158		DLBC	0.574119	0.544988	0.0656194	4.52628	28
UCEC	0.219491	0.890472	0.739951	1.07161	541		CESC	0.338273	0.87856	0.674037	1.14514	287			UCS	0.41268	0.891224	0.676592	1.17394	55		PRAD	0.598998	1.1249	0.725429	1.74436	337
TGCT	0.266958	2.00879	0.586245	6.88317	134		STAD	0.35245	0.893072	0.703661	1.13347	332			ESCA	0.495251	1.10122	0.8347	1.45284	161		LUSC	0.632307	1.0744	0.800766	1.44154	300
ESCA	0.313745	1.17022	0.861883	1.58886	161		KIRP	0.431427	0.788041	0.435342	1.42649	281			UCEC	0.500428	1.05911	0.896183	1.25165	541		UCS	0.642046	1.13801	0.659801	1.96281	25
CESC	0.328989	0.891372	0.707596	1.12288	291		KIRC	0.444506	0.879984	0.634079	1.22125	517			KIRP	0.538679	1.14998	0.736566	1.79545	283		PCPG	0.651106	1.37205	0.34834	5.40428	160
KIRP	0.340201	0.788828	0.484489	1.28434	285		UCS	0.469493	0.882595	0.6292	1.23804	53			CESC	0.591359	0.937689	0.7414	1.18595	291		LIHC	0.729771	0.971237	0.82302	1.14615	313
STAD	0.403234	0.922844	0.764469	1.11403	353		PRAD	0.483418	0.723162	0.29212	1.79024	493			LUSC	0.630081	1.04594	0.871213	1.2557	495		ESCA	0.749039	1.08389	0.661684	1.77548	73
HNSC	0.408227	1.06638	0.915715	1.24185	499		READ	0.509741	0.764763	0.344544	1.6975	153			CHOL	0.634023	1.1333	0.677028	1.89708	36		KICH	0.838095	0.819248	0.121027	5.54558	28
COAD	0.45145	0.903598	0.694039	1.17643	438		UCEC	0.552501	0.932577	0.740728	1.17411	539			LIHC	0.647132	0.965965	0.832854	1.12035	366		COAD	0.844394	0.944994	0.53712	1.6626	187
LUSC	0.578633	1.04335	0.898236	1.21191	494		CHOL	0.679179	1.13245	0.628095	2.04179	35			COAD	0.662222	0.94799	0.745985	1.20469	437		CHOL	0.851958	1.07106	0.520813	2.20267	24
GBM	0.59696	0.941523	0.753067	1.17714	160		ACC	0.701636	0.93021	0.642459	1.34684	77			SARC	0.875927	1.01497	0.842288	1.22305	259		UCEC	0.887661	0.983054	0.775515	1.24613	422
PCPG	0.703927	1.25551	0.388289	4.05963	179		GBM	0.761082	0.963114	0.7559	1.22713	147			TGCT	0.876344	0.974245	0.701351	1.35332	134		ACC	0.916973	1.03196	0.571186	1.86444	45
UCS	0.769493	0.954908	0.701354	1.30013	55		LIHC	0.807435	0.971807	0.77216	1.22307	357			ACC	0.906254	0.982537	0.732841	1.31731	79		TGCT	0.951649	1.01128	0.703817	1.45305	105
DLBC	0.796502	0.826435	0.194072	3.51928	47		ESCA	0.855945	1.03303	0.727318	1.46725	160			DLBC	0.9484	0.961668	0.294401	3.14131	47		KIRC	0.981915	0.990586	0.437249	2.24417	115
LIHC	0.842393	1.01826	0.851918	1.21708	365		COAD	0.864199	1.0308	0.728143	1.45925	422			PCPG	0.960954	0.984224	0.520717	1.86031	178
PRAD	0.846705	0.933813	0.466385	1.86971	495		PCPG	0.881483	1.11441	0.268262	4.62951	179			PRAD	0.961448	0.994562	0.797259	1.24069	495
CHOL	0.85465	1.05311	0.605398	1.8319	36		DLBC	0.9046	1.13396	0.145134	8.85983	47			KIRC	0.983742	0.997213	0.762456	1.30425	526
ACC	0.962458	0.991478	0.694253	1.41595	79
