# Supplementary material for: Pan-cancer analysis of the prognostic and immunological role of PSMB8
Source: Sci Rep. 2021 Oct 14;11:20492. doi: 10.1038/s41598-021-99724-9 (PMC8516870; doi:10.1038/s41598-021-99724-9)
Supplement: Supplementary file 3 — Supplementary Information 3. [file 41598_2021_99724_MOESM3_ESM.xlsx]

## Sheet: Sheet1
	Luminal A						Luminal B						Her2-enriched						Basal-like						Normal-like						Controls (Normal breast)
	Epithelial		Stromal		Immune		Epithelial		Stromal		Immune		Epithelial		Stromal		Immune		Epithelial		Stromal		Immune		Epithelial		Stromal		Immune		Epithelial		Stromal		Immune
Gene Names	Mean	Std. Error	Mean	Std. Error	Mean	Std. Error	Mean	Std. Error	Mean	Std. Error	Mean	Std. Error	Mean	Std. Error	Mean	Std. Error	Mean	Std. Error	Mean	Std. Error	Mean	Std. Error	Mean	Std. Error	Mean	Std. Error	Mean	Std. Error	Mean	Std. Error	Mean	Std. Error	Mean	Std. Error	Mean	Std. Error
PSMB1	2687.7	80.7648	2569.23	470.343	2863.83	375.631	2980.31	134.958	3319.79	1483.5	3308.3	756.103	3394.66	321.672	0	2219.57	5135.62	886.469	3773.27	244.498	2642.43	1526.93	3153.31	575.144	2952.49	472.998	871.349	1594.37	3135.43	804.617	1498.03	175.294	3732.26	358.001	2337.26	740.159
PSMB10	665.016	51.067	0	297.394	2841.96	237.508	558.979	57.8849	148.116	636.291	2669.18	324.301	562.822	216.343	93.8724	1492.79	3468.31	596.202	605.321	122.792	5.68434e-14	766.857	3204.3	288.849	924.57	299.222	86.0796	1008.61	2235.17	509.006	686.414	88.251	0	180.234	1653.27	372.629
PSMB11	0.130443	0.191394	0	1.1146	0.982943	0.890157	0.108031	0.0276228	0.0325974	0.303639	0.0552976	0.154757	0.241985	0.0809194	0.15646	0.558351	0	0.222999	0.0393303	0.0549669	0.958021	0.343279	0.274113	0.129302	0.342977	0.213298	0	0.718979	0.00482321	0.362841	0.0754439	0.0893825	0	0.182544	0.930107	0.377406
PSMB2	1609.04	34.5887	980.986	201.431	2452.72	160.869	1777.8	77.7518	3274.76	854.675	3100.37	435.606	2428.73	202.105	1437.97	1394.54	3331.37	556.965	3396.21	190.203	-5.68434e-14	1187.85	3973.72	447.425	1806.59	235.006	896.37	792.152	2752.87	399.769	1421.55	65.3975	1258.6	133.56	2007.03	276.133
PSMB3	2270.77	122.505	43.5909	713.419	2523.31	569.76	2460.36	253.399	4732.3	2785.45	3226.78	1419.67	6001.92	1369.68	623.661	9450.92	0	3774.58	3784.09	675.935	0	4221.34	1198.87	1590.04	2006.6	478.542	1344.23	1613.06	1869.11	814.048	1141.64	120.951	939.997	247.017	1743.99	510.702
PSMB4	4804.27	138.835	809.404	808.521	4716.24	645.712	4776.69	291.056	9879.75	3199.39	5761.56	1630.64	5803.69	478.075	591.195	3298.76	5260.48	1317.49	9879.74	684.303	672.214	4273.6	6039.04	1609.72	5753.16	957.819	0	3228.59	4400.07	1629.35	2428.95	208.634	3352.97	426.09	2965.44	880.932
PSMB5	2162.9	59.6014	1296.76	347.095	1721.94	277.201	2373.22	134.577	4646.88	1479.32	3058.06	753.968	2900.6	278.338	2752.56	1920.56	3309.32	767.049	3160.17	318.455	2788.71	1988.81	1755.31	749.119	1977.77	385.636	1342.89	1299.89	2630.29	656.006	1169.78	120.406	1547.1	245.903	1791.34	508.398
PSMB6	1583.7	51.6146	700.051	300.583	1474.37	240.055	1484.75	75.1198	1469.65	825.743	2194.4	420.859	1461.19	168.645	699.355	1163.66	2544.76	464.753	1926.06	121.589	2101.76	759.343	1395.34	286.019	1497.44	253.78	1418.99	855.436	1478.89	431.706	999.119	126.249	1375.09	257.836	1547.41	533.071
PSMB7	2007.24	51.5105	1416.24	299.977	1979.05	239.571	2250.14	150.584	3280.37	1655.28	2136.21	843.651	2956.25	303.161	0	2091.84	2761.41	835.455	2939.09	181.272	869.997	1132.08	1992.25	426.416	2629.27	451.718	1371.39	1522.64	1617.45	768.417	1701.33	115.132	1837.07	235.132	1133.18	486.13
PSMB8	1269.36	75.9971	0	442.577	4876.16	353.457	1288.55	126.801	0	1393.84	6674.62	710.403	1304.22	393.284	0	2713.7	5710.27	1083.82	1431.43	231.573	0	1446.22	5975.22	544.741	1051.15	536.791	1307.78	1809.4	4015.03	913.135	1278.25	109.986	40.387	224.623	3193.94	464.404
PSMB9	242.98	28.5319	0	166.158	2512.27	132.699	322.958	66.5371	0	731.399	3521.11	372.775	328.479	150.307	0	1037.13	2872.93	414.219	272.901	126.72	0	791.39	4071.43	298.09	362.827	215.349	168.189	725.893	2003.02	366.331	250.165	42.9326	112.025	87.6805	1416.53	181.278
